# Supplementary material for: Analyzing Big Data in Psychology: A Split/Analyze/Meta-Analyze Approach
Source: PubMed Central journal article supplement (PMC4876837; doi:10.3389/fpsyg.2016.00738), 2016-05-23
Supplement: DataSheet1.pdf [file DataSheet1.pdf]

# Illustrations with the World Values Survey data in R

*Mike Cheung and Suzanne Jak*

*12 May 2016*

## Contents

|                                                                                           |           |
|-------------------------------------------------------------------------------------------|-----------|
| <b>Introduction</b>                                                                       | <b>1</b>  |
| <b>Data preparation</b>                                                                   | <b>1</b>  |
| Installing the R packages . . . . .                                                       | 2         |
| Preparing the dataset . . . . .                                                           | 2         |
| <b>Multiple regression: Fixed-effects model</b>                                           | <b>2</b>  |
| <b>Multiple regression and mediation analysis: Random-effects models</b>                  | <b>7</b>  |
| Multiple regression . . . . .                                                             | 9         |
| Mediation analysis . . . . .                                                              | 11        |
| <b>Confirmatory factor analysis and reliability generalization: Random-effects models</b> | <b>16</b> |
| Confirmatory factor analysis using the TSSEM approach . . . . .                           | 17        |
| Reliability generalizability with a random-effects model . . . . .                        | 22        |
| <b>Settings of the R system</b>                                                           | <b>24</b> |

## Introduction

- This is an appendix in Cheung and Jak (2016).
- Cheung, M. W.-L., & Jak, S. (2016). Analyzing big data in psychology: A split/analyze/meta-analyze approach. *Frontiers in Psychology*, 7(738). <http://doi.org/10.3389/fpsyg.2016.00738>
- The updated version is available at <https://github.com/mikewlcheung/code-in-articles/tree/master/Cheung%20and%20Jak%202016/>.

## Data preparation

- Before running the analyses, we need to install some R packages and download the data. The analyses should run fine in computer systems with at least 8GB RAM.

## Installing the R packages

- R can be downloaded at <http://www.r-project.org/>.
- We only need to install the following packages once.

```
## Installing the R packages from the CRAN
install.packages(c("data.table", "lavaan", "semPlot", "metaSEM"))
```

## Preparing the dataset

- The dataset is available at <http://www.worldvaluessurvey.org/WVSDocumentationWVL.jsp>. Users are required to register before downloading the data.
- In this illustration, we use the dataset in the R format (WVS\_Longitudinal\_1981-2014\_rdata\_v\_2015\_04\_18.zip).
- The dataset contains data from 343,309 participants on 1,377 variables spanning across 100 regions and 6 waves (1981-1984, 1990-1994, 1995-1998, 1999-2004, 2005-2009, and 2010-2014).
- The sizes of the data in harddisk and in RAM are 1,389 MB and 1,821 MB, respectively.
- The latest version of the data may be slightly different from that used in this illustration.
- The following R code is used to read and clean up the data. The final data set is named `WVS.Rdata` for ease of manipulations.

```
## Library for efficiently handling large data
library("data.table")

## Unzip the downloaded file
unzip("WVS_Longitudinal_1981-2014_rdata_v_2015_04_18.zip")

## Load the data into R
load("WVS_Longitudinal_1981_2014_R_v2015_04_18.rdata")

## Display the size of the dataset
print(object.size(x=lapply(ls(), get)), units="Mb")

## 1895.3 Mb

## Rename the object for ease of data analyses
WVS <- `WVS_Longitudinal_1981_2014_R_v2015_04_18`

## Remove the old one to clean up memory
rm("WVS_Longitudinal_1981_2014_R_v2015_04_18")

## Convert it into data.table for more efficient data analyses
WVS <- data.table(WVS)

## Save the data so that we do not need to read it from raw data each time
save(WVS, file="WVS.Rdata")
```

## Multiple regression: Fixed-effects model

- We randomly split the data into  $k=100$  studies.
- We regress *satisfaction with your life* (A170) on *subjective state of health* (A009), *freedom of choice and control* (A173), *satisfaction with financial situation of household* (C006), *sex* (X001), and *age* (X003) in each study.

- The following figure displays the regression model.

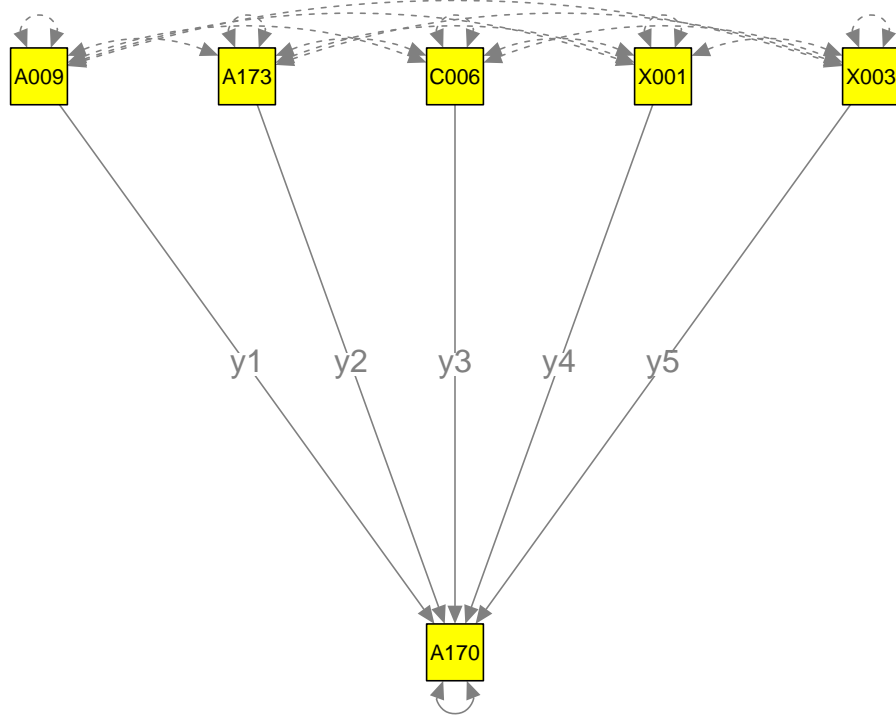

- The estimated regression coefficients with their estimated sampling covariance matrices are treated as multiple effect sizes for a multivariate fixed-effects meta-analysis.
- The variables used in this demonstration are:
  - *State of health (subjective)* (A009): 1 (Very good); 4 (Very poor) (it is reversed before the analyses)
  - *Satisfaction with your life* (A170): 1 (Dissatisfied); 10 (Satisfied)
  - *How much freedom of choice and control* (A173): 1 (None at all); 10 (A great deal)
  - *Satisfaction with financial situation of household* (C006): 1 (None at all); 10 (A great deal)
  - *Sex* (X001): 1 (Male); 2 (Female)
  - *Age* (X003)
  - Negative values in the original dataset represent missing values. They are recoded into missing values (NA) before the analysis.

```
## Load the libraries
library("data.table")
library("lavaan")
library("metaSEM")

## Load the data
load("WVS.Rdata")

## Select the relevant variables to minimize the memory usage
WVS <- WVS[, list(A009, A170, A173, C006, X001, X003, S002, S003)]
```

```

## Reverse coding for A009
## Recode all negative values as NA
## Age (X003) is divided by 10 to improve numerical stability.
WVS[, `:=`(A009 = 5-ifelse(A009 < 0, yes=NA, no=A009),
          A170 = ifelse(A170 < 0, yes=NA, no=A170),
          A173 = ifelse(A173 < 0, yes=NA, no=A173),
          C006 = ifelse(C006 < 0, yes=NA, no=C006),
          X001 = ifelse(X001 < 0, yes=NA, no=X001),
          X003 = ifelse(X003 < 0, yes=NA, no=X003/10))]

```

```

## No. of studies
k <- 100

```

```

## Set seed for replicability
set.seed (871139100)

```

```

## Randomly split the data into 100 studies
Study <- sample(1:nrow(WVS)) %% k + 1

```

```

## Show the sample sizes in the studies
table(Study)

```

```

## Study
##   1   2   3   4   5   6   7   8   9  10  11  12  13  14  15
## 3412 3413 3413 3413 3413 3413 3413 3413 3413 3413 3413 3413 3413 3413 3413
##  16  17  18  19  20  21  22  23  24  25  26  27  28  29  30
## 3413 3413 3413 3413 3413 3413 3413 3413 3413 3413 3413 3413 3413 3413 3413
##  31  32  33  34  35  36  37  38  39  40  41  42  43  44  45
## 3413 3413 3413 3413 3413 3413 3413 3413 3413 3413 3413 3413 3413 3413 3413
##  46  47  48  49  50  51  52  53  54  55  56  57  58  59  60
## 3413 3413 3413 3413 3413 3413 3413 3413 3413 3413 3413 3413 3413 3413 3413
##  61  62  63  64  65  66  67  68  69  70  71  72  73  74  75
## 3413 3413 3413 3413 3413 3413 3413 3413 3413 3413 3413 3413 3412 3412 3412
##  76  77  78  79  80  81  82  83  84  85  86  87  88  89  90
## 3412 3412 3412 3412 3412 3412 3412 3412 3412 3412 3412 3412 3412 3412 3412
##  91  92  93  94  95  96  97  98  99 100
## 3412 3412 3412 3412 3412 3412 3412 3412 3412 3412

```

```

## Append "Study" into the dataset
WVS[, Study:=Study]

```

```

## Set "Study" as the key for grouping
setkeyv(WVS, "Study")

```

```

## Function to fit regression analysis
## y1 to y5: Regression coefficients from A170, A009, A173, C006, X001, and X003.
## v11 to v55: Sampling covariance matrix of the parameter estimates
fun.reg <- function(dt) { fit <- try(lm(A170~A009+A173+C006+X001+X003, data=dt), silent=TRUE)

  ## If there are errors during the analysis, it returns missing values.
  if (is.element("try-error", class(fit))) {
    list(y1=NaN,y2=NaN,y3=NaN,y4=NaN,y5=NaN,
         v11=NaN,v21=NaN,v31=NaN,v41=NaN,v51=NaN,

```

```

v22=NaN,v32=NaN,v42=NaN,v52=NaN,v33=NaN,
v43=NaN,v53=NaN,v44=NaN,v54=NaN,v55=NaN)
} else {
## Extract the regression coefficients excluding the intercept
y <- coef(fit)
## Extract the sampling covariance matrix excluding the intercept
v <- lav_matrix_vech(vcov(fit)[-1,-1])
list(y1=y[2],y2=y[3],y3=y[4],y4=y[5],y5=y[6],
v11=v[1],v21=v[2],v31=v[3],v41=v[4],v51=v[5],
v22=v[6],v32=v[7],v42=v[8],v52=v[9],v33=v[10],
v43=v[11],v53=v[12],v44=v[13],v54=v[14],v55=v[15])
}
}

##### Split data by "Study" and analyze data with the fun.reg() function on each "Study"
FEM1.reg <- WVS[, fun.reg(.SD), by=list(Study)]

## Show part of the results
head(FEM1.reg)

```

```

##      Study      y1      y2      y3      y4      y5      v11
## 1:      1 0.4172340 0.2472441 0.4166887 0.18381914 0.02613443 0.001943584
## 2:      2 0.4611036 0.2299132 0.4372900 0.07574541 0.05070009 0.001850344
## 3:      3 0.4840781 0.2180822 0.4305115 0.15025652 0.08443550 0.001874817
## 4:      4 0.4367183 0.2135547 0.4151317 0.18799371 0.07226578 0.001929387
## 5:      5 0.4317655 0.2386997 0.4117610 0.16551637 0.06303773 0.001688562
## 6:      6 0.4569928 0.2234663 0.4309035 0.02990574 0.02784601 0.001764056
##              v21              v31              v41              v51              v22
## 1: -8.309871e-05 -0.0001485747 0.0001884341 0.0002996525 0.0002227032
## 2: -7.026020e-05 -0.0001365603 0.0001993570 0.0002644988 0.0002270086
## 3: -7.313360e-05 -0.0001708280 0.0001704147 0.0002951250 0.0002275445
## 4: -8.143360e-05 -0.0001564048 0.0002265432 0.0002856373 0.0002368035
## 5: -8.091491e-05 -0.0001056602 0.0002239312 0.0002577971 0.0002298147
## 6: -7.421872e-05 -0.0001302892 0.0002535206 0.0002962435 0.0002395230
##              v32              v42              v52              v33              v43
## 1: -5.649100e-05 4.381821e-05 -6.614984e-06 0.0002128558 3.510466e-05
## 2: -6.593839e-05 1.663411e-05 -3.576725e-06 0.0002103659 1.967535e-05
## 3: -6.394873e-05 2.954931e-06 -1.262202e-05 0.0002194710 -3.239623e-05
## 4: -6.269739e-05 6.706484e-05 -6.070603e-06 0.0002202558 -4.082936e-05
## 5: -6.218454e-05 -1.571006e-06 -7.463032e-06 0.0002088528 -1.771415e-05
## 6: -6.178713e-05 9.489065e-06 -1.026288e-05 0.0002150476 -2.265777e-05
##              v53              v44              v54              v55
## 1: -2.915789e-05 0.005021478 1.211366e-05 0.0005184840
## 2: -2.325082e-05 0.004841140 3.819308e-05 0.0005119052
## 3: -2.981189e-05 0.004837433 6.794178e-05 0.0005053063
## 4: -3.280232e-05 0.004980850 -8.724074e-06 0.0005186820
## 5: -1.762765e-05 0.004806231 4.151940e-05 0.0005030697
## 6: -2.817320e-05 0.004919920 6.040220e-05 0.0005383494

```

```

##### Meta-analyze results with a multivariate fixed-effects meta-analysis:
##### Variance component is fixed at 0: RE.constraints=matrix(0, ncol=5, nrow=5)
FEM2.reg <- meta(y=cbind(y1,y2,y3,y4,y5),
v=cbind(v11,v21,v31,v41,v51,v22,v32,v42,v52,v33,v43,v53,v44,v54,v55),

```

```

data=FEM1.reg, RE.constraints=matrix(0, ncol=5, nrow=5),
model.name="Regression analysis FEM")
summary(FEM2.reg)

```

```

##
## Call:
## meta(y = cbind(y1, y2, y3, y4, y5), v = cbind(v11, v21, v31,
##       v41, v51, v22, v32, v42, v52, v33, v43, v53, v44, v54, v55),
##       data = FEM1.reg, RE.constraints = matrix(0, ncol = 5, nrow = 5),
##       model.name = "Regression analysis FEM")
##
## 95% confidence intervals: z statistic approximation
## Coefficients:
##           Estimate Std.Error   lbound   ubound z value Pr(>|z|)
## Intercept1 0.4332823 0.0042807 0.4248923 0.4416723 101.218 < 2.2e-16 ***
## Intercept2 0.2314661 0.0015236 0.2284800 0.2344522 151.925 < 2.2e-16 ***
## Intercept3 0.4243198 0.0014509 0.4214761 0.4271634 292.459 < 2.2e-16 ***
## Intercept4 0.1703349 0.0069530 0.1567073 0.1839625 24.498 < 2.2e-16 ***
## Intercept5 0.0580356 0.0022538 0.0536183 0.0624529 25.750 < 2.2e-16 ***
## ---
## Signif. codes:  0 '***' 0.001 '**' 0.01 '*' 0.05 '.' 0.1 ' ' 1
##
## Q statistic on the homogeneity of effect sizes: 566.5829
## Degrees of freedom of the Q statistic: 495
## P value of the Q statistic: 0.01409095
##
## Heterogeneity indices (based on the estimated Tau2):
##           Estimate
## Intercept1: I2 (Q statistic)      0
## Intercept2: I2 (Q statistic)      0
## Intercept3: I2 (Q statistic)      0
## Intercept4: I2 (Q statistic)      0
## Intercept5: I2 (Q statistic)      0
##
## Number of studies (or clusters): 100
## Number of observed statistics: 500
## Number of estimated parameters: 5
## Degrees of freedom: 495
## -2 log likelihood: -2145.318
## OpenMx status1: 0 ("0" or "1": The optimization is considered fine.
## Other values may indicate problems.)

```

- As a comparison we also test the regression analysis on all data ( $N=343,309$ ).

```
summary( lm(A170~A009+A173+C006+X001+X003, data=WVS) )
```

```

##
## Call:
## lm(formula = A170 ~ A009 + A173 + C006 + X001 + X003, data = WVS)
##
## Residuals:
##      Min       1Q   Median       3Q      Max

```

```

## -8.9722 -1.1023 0.0737 1.1220 8.1854
##
## Coefficients:
##           Estimate Std. Error t value Pr(>|t|)
## (Intercept) 0.860691  0.021981  39.16 <2e-16 ***
## A009         0.433275  0.004282 101.18 <2e-16 ***
## A173         0.231292  0.001524 151.75 <2e-16 ***
## C006         0.424283  0.001451 292.34 <2e-16 ***
## X001         0.170776  0.006956  24.55 <2e-16 ***
## X003         0.057962  0.002255  25.71 <2e-16 ***
## ---
## Signif. codes:  0 '***' 0.001 '**' 0.01 '*' 0.05 '.' 0.1 ' ' 1
##
## Residual standard error: 1.905 on 301818 degrees of freedom
## (39447 observations deleted due to missingness)
## Multiple R-squared:  0.39, Adjusted R-squared:  0.3899
## F-statistic: 3.859e+04 on 5 and 301818 DF, p-value: < 2.2e-16

```

## Multiple regression and mediation analysis: Random-effects models

- The data are grouped according to Wave and Country.
- Random-effects models are used to account for the differences in Wave and Country and mixed-effects models are also fitted by using Wave as a moderator.

```

## Clear all objects in the work space
rm(list=ls())

## Load the data
load("WVS.Rdata")

## Sample sizes of S002 (Wave) and S003 (Country)
## Please refer to http://www.worldvaluessurvey.org/WVSDocumentationWVL.jsp
## for the country names.
table(WVS[, c("S002", "S003"), with=FALSE])

```

```

##      S003
## S002  8  12  20  31  32  36  48  50  51  70  76 100 112 124
##      1  0  0  0  0 1005 1228  0  0  0  0  0  0  0  0
##      2  0  0  0  0 1002  0  0  0  0  0 1782  0 1015  0
##      3 999  0  0 2002 1079 2048  0 1525 2000  0  0 1072 2092  0
##      4 1000 1282  0  0 1280  0  0 1500  0 1200  0  0  0 1931
##      5  0  0 1003  0 1002 1421  0  0  0  0 1500 1001  0 2164
##      6  0 1200  0 1002 1030 1477 1200  0 1100  0 1486  0 1535  0
##      S003
## S002 152 156 158 170 191 196 203 214 218 222 231 233 246 250
##      1  0  0  0  0  0  0  0  0  0  0  0  0 1003  0
##      2 1500 1000  0  0  0  0  924  0  0  0  0  0  0  0
##      3 1000 1500 780 6025 1196  0 1147 417  0 1254  0 1021 987  0
##      4 1200 1000  0  0  0  0  0  0  0  0  0  0  0  0
##      5 1000 1991 1227 3025  0 1050  0  0  0  0 1500  0 1014 1001
##      6 1000 2300 1238 1512  0 1000  0  0 1202  0  0 1533  0  0
##      S003

```

```

## S002 268 275 276 288 320 344 348 356 360 364 368 376 380 392
## 1 0 0 0 0 0 0 1464 0 0 0 0 0 0 1204
## 2 0 0 0 0 0 0 0 2500 0 0 0 0 0 1011
## 3 2008 0 2026 0 0 0 650 2040 0 0 0 0 0 1054
## 4 0 0 0 0 0 0 0 2002 1000 2532 2325 1199 0 1362
## 5 1500 0 2064 1534 1000 1252 1007 2001 2015 2667 2701 0 1012 1096
## 6 1202 1000 2046 1552 0 1000 0 1581 0 0 1200 0 0 2443
## S003
## S002 398 400 410 414 417 422 428 434 440 458 466 484 498 499
## 1 0 0 970 0 0 0 0 0 0 0 0 1837 0 0
## 2 0 0 1251 0 0 0 0 0 0 0 0 1531 0 0
## 3 0 0 1249 0 0 0 1200 0 1009 0 0 2364 984 240
## 4 0 1223 1200 0 1043 0 0 0 0 0 0 1535 1008 1060
## 5 0 1200 1200 0 0 0 0 0 0 1201 1534 1560 1046 0
## 6 1500 1200 1200 1303 1500 1200 0 2131 0 1300 0 2000 0 0
## S003
## S002 504 528 554 566 578 586 604 608 616 630 634 642 643 646
## 1 0 0 0 0 0 0 0 0 0 0 0 0 0 0
## 2 0 0 0 1001 0 0 0 0 938 0 0 0 1961 0
## 3 0 0 1201 1996 1127 733 1211 1200 1153 1164 0 1239 2040 0
## 4 1251 0 0 2022 0 2000 1501 1200 0 720 0 0 0 0
## 5 1200 1050 954 0 1025 0 1500 0 1000 0 0 1776 2033 1507
## 6 1200 1902 841 1759 0 1200 1210 1200 966 0 1060 1503 2500 1527
## S003
## S002 682 688 702 703 704 705 710 716 724 752 756 764 780 788
## 1 0 0 0 0 0 0 1596 0 0 0 0 0 0 0
## 2 0 0 0 466 0 0 2736 0 1510 0 1400 0 0 0
## 3 0 1280 0 1095 0 1007 2935 0 1211 1009 1212 0 0 0
## 4 1502 1200 1512 0 1000 0 3000 1002 1209 0 0 0 0 0
## 5 0 0 0 0 1495 1037 2988 0 1200 1003 1241 1534 1002 0
## 6 0 0 1972 0 0 1069 3531 1500 1189 1206 0 1200 999 1205
## S003
## S002 792 800 804 807 818 826 834 840 854 858 860 862 887 891
## 1 0 0 0 0 0 0 0 0 0 0 0 0 0
## 2 1030 0 0 0 0 0 0 0 0 0 0 0 0
## 3 1907 0 2811 995 0 1093 0 1542 0 1000 0 1200 0 0
## 4 3401 1002 0 1055 3000 0 1171 1200 0 0 0 1200 0 0
## 5 1346 0 1000 0 3051 1041 0 1249 1534 1000 0 0 0 1220
## 6 1605 0 1500 0 1523 0 0 2232 0 1000 1500 0 1000 0
## S003
## S002 894 914
## 1 0 0
## 2 0 0
## 3 0 800
## 4 0 0
## 5 1500 0
## 6 0 0

```

```

## Select the relevant variables to minimize memory usage
WVS <- WVS[, list(A009, A170, A173, C006, X001, X003, S002, S003)]

## Set Wave and Country as key variables for fast reference
## S002: Wave (1 to 6)
## S003: Country

```



```

setkeyv(WVS, c("S002", "S003"))

## Reverse coding for A009
## Recode all negative values as NA
## Age (X003) is divided by 10 to improve numerical stability.
WVS[, `:=`(A009 = 5-ifelse(A009 < 0, yes=NA, no=A009),
          A170 = ifelse(A170 < 0, yes=NA, no=A170),
          A173 = ifelse(A173 < 0, yes=NA, no=A173),
          C006 = ifelse(C006 < 0, yes=NA, no=C006),
          X001 = ifelse(X001 < 0, yes=NA, no=X001),
          X003 = ifelse(X003 < 0, yes=NA, no=X003/10))]

```

## Multiple regression

- We conduct the same regression analysis in each Wave and Country.
- Wave is used as a moderator in predicting the estimated regression coefficients (effect sizes).

```

## Function to fit regression model
## y1 to y5: Regression coefficients from A170, A009, A173, C006, X001, and X003.
## v11 to v55: Sampling covariance matrix of the parameter estimates
fun.reg <- function(dt) { fit <- try(lm(A170~A009+A173+C006+X001+X003, data=dt), silent=TRUE)

  ## If there are errors during the analysis, it returns missing values.
  if (is.element("try-error", class(fit))) {
    list(y1=NaN,y2=NaN,y3=NaN,y4=NaN,y5=NaN,
         v11=NaN,v21=NaN,v31=NaN,v41=NaN,v51=NaN,
         v22=NaN,v32=NaN,v42=NaN,v52=NaN,v33=NaN,
         v43=NaN,v53=NaN,v44=NaN,v54=NaN,v55=NaN)
  } else {
    ## Extract the regression coefficients excluding the intercept
    y <- coef(fit)
    ## Extract the sampling covariance matrix excluding the intercept
    v <- lav_matrix_vech(vcov(fit)[-1,-1])
    list(y1=y[2],y2=y[3],y3=y[4],y4=y[5],y5=y[6],
         v11=v[1],v21=v[2],v31=v[3],v41=v[4],v51=v[5],
         v22=v[6],v32=v[7],v42=v[8],v52=v[9],v33=v[10],
         v43=v[11],v53=v[12],v44=v[13],v54=v[14],v55=v[15])
  }
}

##### Split data by Wave and Country and analyze with the fun.reg() function
REM1.reg <- WVS[, fun.reg(.SD), by=list(S002,S003)]

##### Meta-analyze results with a mixed-effects meta-analysis by using "Wave" as a predictor
REM2.reg <- meta(y=cbind(y1,y2,y3,y4,y5),
                v=cbind(v11,v21,v31,v41,v51,v22,v32,v42,v52,v33,v43,v53,v44,v54,v55),
                x=S002, data=REM1.reg,
                #RE.constraints=Diag(paste(0.1, "*Tau2_", 1:5, "_", 1:5, sep = "")),
                #RE.lbound=NA,
                model.name="Regression analysis REM")

## Rerun the analysis to remove error code
## REM2.reg <- rerun(REM2.reg)

```

summary(REM2.reg)

```
##
## Call:
## meta(y = cbind(y1, y2, y3, y4, y5), v = cbind(v11, v21, v31,
##       v41, v51, v22, v32, v42, v52, v33, v43, v53, v44, v54, v55),
##       x = S002, data = REM1.reg, model.name = "Regression analysis REM")
##
## 95% confidence intervals: z statistic approximation
## Coefficients:
##           Estimate  Std.Error   lbound   ubound z value
## Intercept1 2.4798e-01 3.6718e-02 1.7601e-01 3.1994e-01 6.7535
## Intercept2 2.4405e-01 1.9082e-02 2.0665e-01 2.8145e-01 12.7898
## Intercept3 4.7955e-01 3.3691e-02 4.1352e-01 5.4559e-01 14.2338
## Intercept4 1.2161e-01 3.4507e-02 5.3975e-02 1.8924e-01 3.5241
## Intercept5 6.0495e-02 1.3172e-02 3.4678e-02 8.6313e-02 4.5926
## Slope1_1    3.4926e-02 7.9917e-03 1.9262e-02 5.0589e-02 4.3703
## Slope2_1   -8.7358e-03 4.1514e-03 -1.6872e-02 -5.9917e-04 -2.1043
## Slope3_1   -2.3119e-02 7.3282e-03 -3.7482e-02 -8.7559e-03 -3.1548
## Slope4_1    1.8811e-03 7.4658e-03 -1.2752e-02 1.6514e-02 0.2520
## Slope5_1   -5.9947e-03 2.8470e-03 -1.1575e-02 -4.1470e-04 -2.1056
## Tau2_1_1    2.1200e-02 2.4216e-03 1.6454e-02 2.5946e-02 8.7546
## Tau2_2_1   -7.7709e-04 8.8281e-04 -2.5074e-03 9.5319e-04 -0.8802
## Tau2_2_2    6.2815e-03 6.4521e-04 5.0170e-03 7.5461e-03 9.7356
## Tau2_3_1   -5.8669e-03 1.6097e-03 -9.0218e-03 -2.7120e-03 -3.6447
## Tau2_3_2   -3.4483e-03 8.4351e-04 -5.1016e-03 -1.7951e-03 -4.0881
## Tau2_3_3    2.0893e-02 2.0290e-03 1.6916e-02 2.4869e-02 10.2971
## Tau2_4_1    9.6175e-04 1.6118e-03 -2.1973e-03 4.1208e-03 0.5967
## Tau2_4_2   -2.9473e-04 8.1345e-04 -1.8891e-03 1.2996e-03 -0.3623
## Tau2_4_3    2.2565e-03 1.4378e-03 -5.6155e-04 5.0746e-03 1.5694
## Tau2_4_4    1.2287e-02 2.1230e-03 8.1257e-03 1.6448e-02 5.7874
## Tau2_5_1    1.5727e-03 6.3030e-04 3.3733e-04 2.8080e-03 2.4952
## Tau2_5_2    8.7684e-05 3.1536e-04 -5.3042e-04 7.0579e-04 0.2780
## Tau2_5_3   -1.6770e-03 5.6525e-04 -2.7849e-03 -5.6918e-04 -2.9669
## Tau2_5_4    1.2997e-04 5.7543e-04 -9.9785e-04 1.2578e-03 0.2259
## Tau2_5_5    2.0429e-03 3.0799e-04 1.4392e-03 2.6465e-03 6.6330
##           Pr(>|z|)
## Intercept1 1.443e-11 ***
## Intercept2 < 2.2e-16 ***
## Intercept3 < 2.2e-16 ***
## Intercept4 0.0004249 ***
## Intercept5 4.379e-06 ***
## Slope1_1   1.241e-05 ***
## Slope2_1   0.0353528 *
## Slope3_1   0.0016061 **
## Slope4_1   0.8010658
## Slope5_1   0.0352368 *
## Tau2_1_1   < 2.2e-16 ***
## Tau2_2_1   0.3787255
## Tau2_2_2   < 2.2e-16 ***
## Tau2_3_1   0.0002677 ***
## Tau2_3_2   4.350e-05 ***
## Tau2_3_3   < 2.2e-16 ***
```

```

## Tau2_4_1    0.5507091
## Tau2_4_2    0.7171115
## Tau2_4_3    0.1165534
## Tau2_4_4    7.149e-09 ***
## Tau2_5_1    0.0125900 *
## Tau2_5_2    0.7809798
## Tau2_5_3    0.0030080 **
## Tau2_5_4    0.8213035
## Tau2_5_5    3.289e-11 ***
## ---
## Signif. codes:  0 '***' 0.001 '**' 0.01 '*' 0.05 '.' 0.1 ' ' 1
##
## Q statistic on the homogeneity of effect sizes: 17711.95
## Degrees of freedom of the Q statistic: 1105
## P value of the Q statistic: 0
##
## Explained variances (R2):
##
##           y1          y2          y3          y4          y5
## Tau2 (no predictor)  0.0234364 0.0064104 0.0218444 0.0122459 0.0021
## Tau2 (with predictors) 0.0211999 0.0062815 0.0208926 0.0122867 0.0020
## R2                   0.0954278 0.0200968 0.0435724 0.0000000 0.0271
##
## Number of studies (or clusters): 238
## Number of observed statistics: 1110
## Number of estimated parameters: 25
## Degrees of freedom: 1085
## -2 log likelihood: -1783.684
## OpenMx status1: 0 ("0" or "1": The optimization is considered fine.
## Other values may indicate problems.)

```

## Mediation analysis

- A mediation model is fitted by using *satisfaction with your life* (A170), *freedom of choice and control* (A173), and *subjective state of health* (A009) as the dependent variable, the mediator, and the predictor, respectively.
- The following figure displays the mediation model.

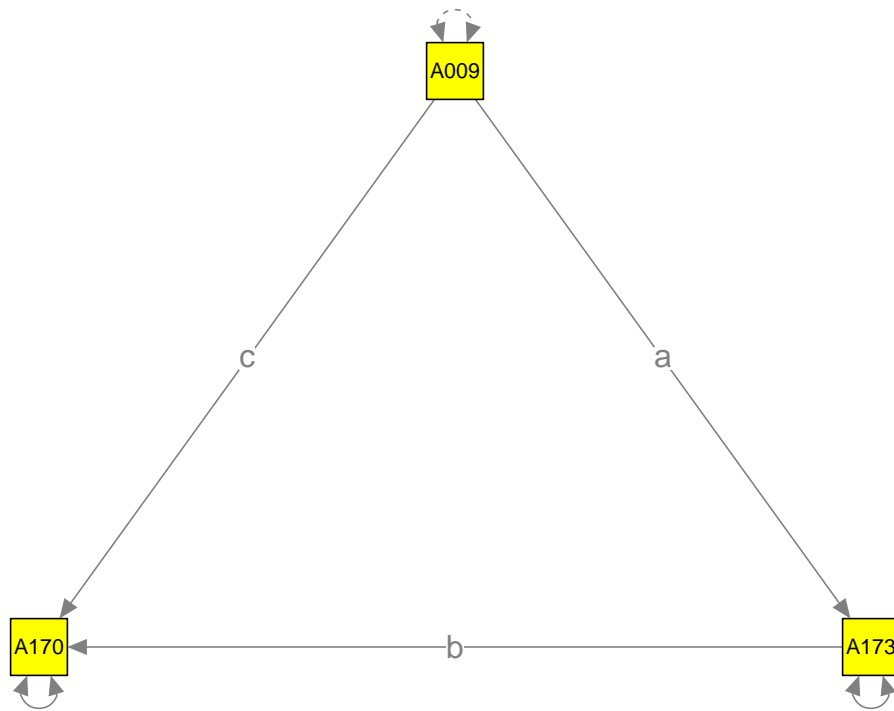

```

## Function to fit a mediation model using sem() function in lavaan,
## where the path coefficients are labelled with "a", "b", and "c."
## y1 and y2: indirect (a*b) and direct effects (c)
## v11, v21, and v22: Sampling covariance matrix of the indirect and direct effects
fun.med <- function(dt) { model.med <- 'A170 ~ b*A173 + c*A009
                                     A173 ~ a*A009
                                     indirect := a*b
                                     direct := c'

  ## If there are errors during the analysis, it returns missing values.
  fit <- try(sem(model.med, data=dt), silent=TRUE)

  if (is.element("try-error", class(fit))) {
    list(y1=NaN,y2=NaN,v11=NaN,v21=NaN,v22=NaN)
  } else {
    ## y: indirect effect and direct effect
    y <- fit@Model@def.function(.x.=fit@Fit@x)
    ## x: all parameter estimates
    x <- fit@Fit@x
    ## Variance covariance matrix of the parameter estimates
    VCOV <- vcov(fit)
    ## Compute the jacobian for 'defined parameters'
    JAC <- lavaan::lavJacobianD(func=fit@Model@def.function, x=x)
    ## Compute the sampling covariance matrix using delta method
    v <- JAC %*% VCOV %*% t(JAC)
    list(y1=y[1],y2=y[2],v11=v[1,1],v21=v[2,1],v22=v[2,2]) }}

```

```
##### Split data by Wave and Country and analyze with the fun.med() function
REM1.med <- WVS[, fun.med(.SD), by=list(S002,S003)]
```

```
## Show part of the results
head(REM1.med)
```

```
##      S002 S003      y1      y2      v11      v21      v22
## 1:     1   32 0.12712825 0.3943876 0.0014586585 -7.038842e-05 0.005209759
## 2:     1   36 0.07668854 0.2951055 0.0003727852 -3.233129e-05 0.002295134
## 3:     1  246 0.10353528 0.2843115 0.0003172598 -1.008331e-04 0.002114249
## 4:     1  348 0.16762658 0.5094084 0.0006545472 -1.691690e-04 0.004251532
## 5:     1  392 0.11221672 0.3754183 0.0005066221 -2.119145e-04 0.005067255
## 6:     1  410 0.05967650 0.3136188 0.0005241833 -3.915344e-05 0.004806417
```

```
##### Meta-analyze results with a random-effects meta-analysis
REM2.med <- meta(y=cbind(y1,y2), v=cbind(v11,v21,v22), data=REM1.med,
                model.name="Mediation analysis REM")
```

```
summary(REM2.med)
```

```
##
## Call:
## meta(y = cbind(y1, y2), v = cbind(v11, v21, v22), data = REM1.med,
##      model.name = "Mediation analysis REM")
##
## 95% confidence intervals: z statistic approximation
## Coefficients:
##      Estimate      Std.Error      lbound      ubound z value
## Intercept1 0.13079543 0.00559540 0.11982865 0.14176221 23.3755
## Intercept2 0.56588632 0.01320744 0.54000021 0.59177244 42.8460
## Tau2_1_1   0.00640692 0.00069401 0.00504668 0.00776716 9.2317
## Tau2_2_1   0.00104956 0.00111144 -0.00112881 0.00322794 0.9443
## Tau2_2_2   0.03514025 0.00373117 0.02782728 0.04245321 9.4180
##      Pr(>|z|)
## Intercept1 <2e-16 ***
## Intercept2 <2e-16 ***
## Tau2_1_1   <2e-16 ***
## Tau2_2_1   0.345
## Tau2_2_2   <2e-16 ***
## ---
## Signif. codes:  0 '***' 0.001 '**' 0.01 '*' 0.05 '.' 0.1 ' ' 1
##
## Q statistic on the homogeneity of effect sizes: 6648.819
## Degrees of freedom of the Q statistic: 454
## P value of the Q statistic: 0
##
## Heterogeneity indices (based on the estimated Tau2):
##      Estimate
## Intercept1: I2 (Q statistic) 0.9574
## Intercept2: I2 (Q statistic) 0.8996
##
## Number of studies (or clusters): 238
```

```
## Number of observed statistics: 456
## Number of estimated parameters: 5
## Degrees of freedom: 451
## -2 log likelihood: -556.4596
## OpenMx status1: 0 ("0" or "1": The optimization is considered fine.
## Other values may indicate problems.)
```

- The following plot shows a multivariate generalization of the average effect size and its 95% confidence interval in univariate meta-analysis.
  - The black dots and the black dashed ellipses are the observed effect sizes and their 95% confidence ellipses in the primary studies.
  - The blue diamond represents the estimated average population effect sizes, while the red ellipse is the 95% confidence ellipse of estimated population average effect sizes.
  - The green ellipse is the 95% confidence ellipse of the random effects. Ninety-five percent of the studies with average population effect sizes falls inside this confidence ellipse in the long run.

```
plot(REM2.med, main="Multivariate meta-analysis",
      axis.label=c("Indirect effect", "Direct effect"),
      study.min.cex=0.6, randeff.ellipse.lty=2,
      randeff.ellipse.lwd=3)
```

## Multivariate meta-analysis

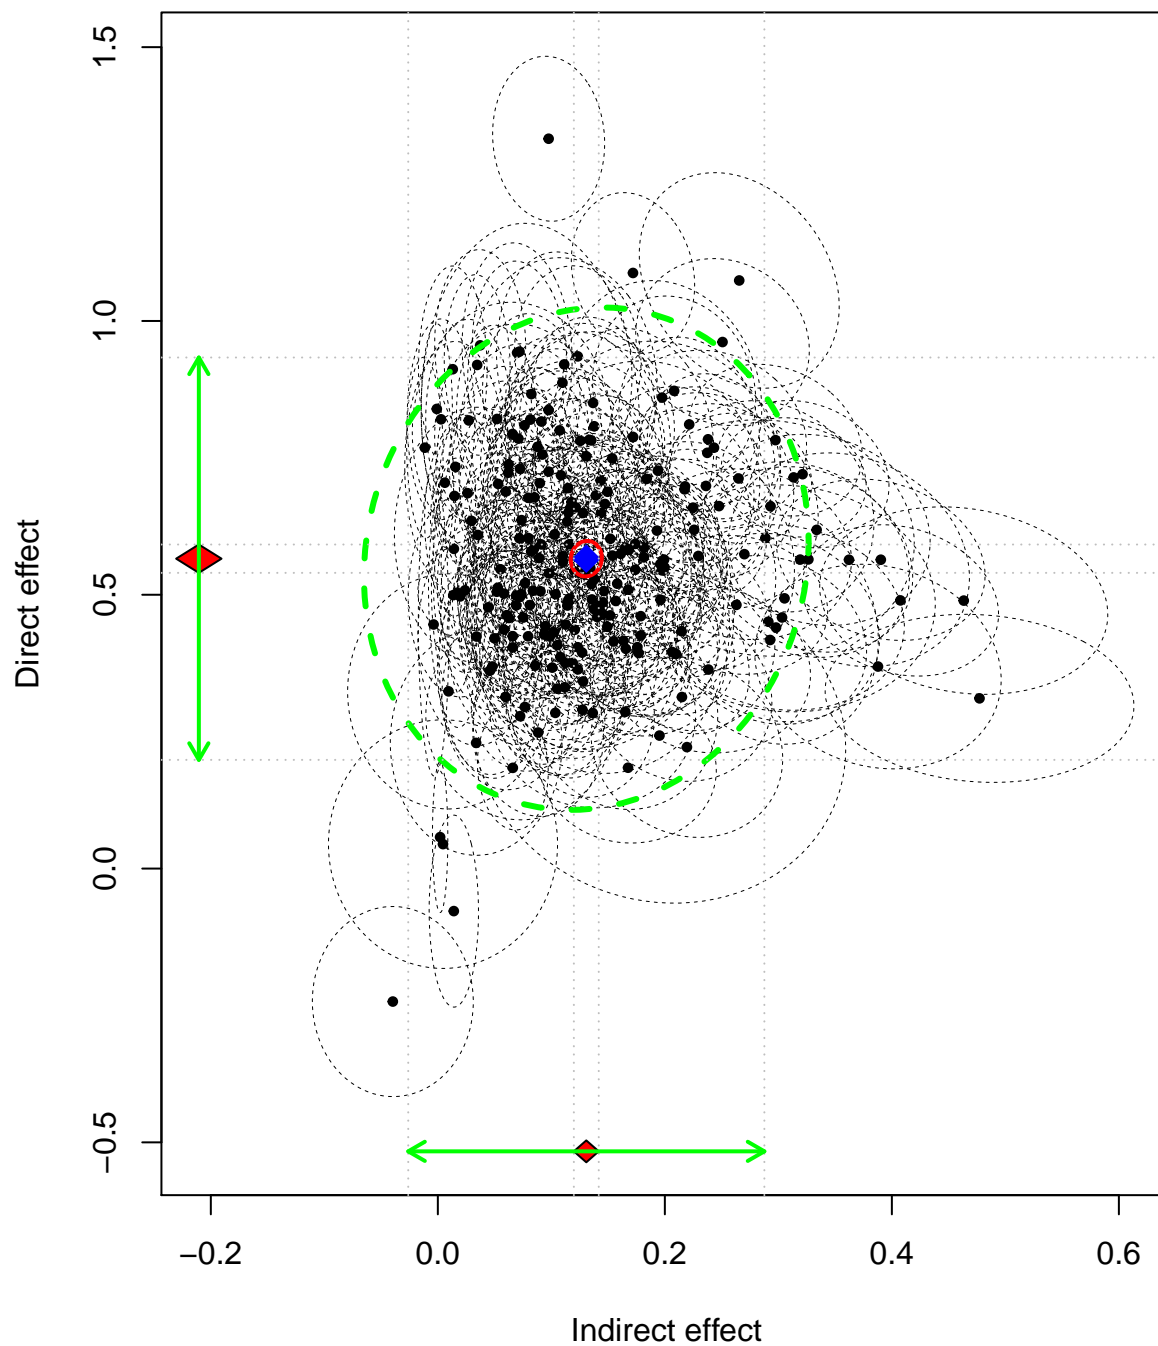

```
##### Meta-analyze results with a mixed-effects meta-analysis
## by using "Wave" (S002) as a predictor
REM3.med <- meta(y=cbind(y1,y2), v=cbind(v11,v21,v22), x=S002, data=REM1.med,
                model.name="Mediation analysis REM")
```

```
summary(REM3.med)
```

```
##
## Call:
## meta(y = cbind(y1, y2), v = cbind(v11, v21, v22), x = S002, data = REM1.med,
##     model.name = "Mediation analysis REM")
##
## 95% confidence intervals: z statistic approximation
## Coefficients:
##           Estimate   Std.Error   lbound   ubound z value
## Intercept1 0.14382797 0.01792491 0.10869580 0.17896015 8.0239
## Intercept2 0.37082687 0.04011584 0.29220127 0.44945247 9.2439
## Slope1_1   -0.00301155 0.00392591 -0.01070619 0.00468310 -0.7671
## Slope2_1    0.04505648 0.00880766 0.02779378 0.06231918 5.1156
## Tau2_1_1    0.00636820 0.00069088 0.00501411 0.00772229 9.2176
## Tau2_2_1    0.00132289 0.00105029 -0.00073563 0.00338142 1.2596
## Tau2_2_2    0.03096986 0.00334583 0.02441215 0.03752757 9.2563
##           Pr(>|z|)
## Intercept1 1.110e-15 ***
## Intercept2 < 2.2e-16 ***
## Slope1_1    0.4430
## Slope2_1   3.127e-07 ***
## Tau2_1_1   < 2.2e-16 ***
## Tau2_2_1    0.2078
## Tau2_2_2   < 2.2e-16 ***
## ---
## Signif. codes:  0 '***' 0.001 '**' 0.01 '*' 0.05 '.' 0.1 ' ' 1
##
## Q statistic on the homogeneity of effect sizes: 6648.819
## Degrees of freedom of the Q statistic: 454
## P value of the Q statistic: 0
##
## Explained variances (R2):
##           y1    y2
## Tau2 (no predictor) 0.0064069 0.0351
## Tau2 (with predictors) 0.0063682 0.0310
## R2                0.0060435 0.1187
##
## Number of studies (or clusters): 238
## Number of observed statistics: 456
## Number of estimated parameters: 7
## Degrees of freedom: 449
## -2 log likelihood: -582.3821
## OpenMx status1: 0 ("0" or "1": The optimization is considered fine.
## Other values may indicate problems.)
```

## Confirmatory factor analysis and reliability generalization: Random-effects models

- The data are grouped according to Wave and Country.
- Random-effects models are used to account for the differences in Wave and Country.



- Items used in the analysis:
  - *Justifiable: claiming government benefits to which you are not entitled* (F114)
  - *Justifiable: avoiding a fare on public transport* (F115)
  - *Justifiable: cheating on taxes* (F116)
  - *Justifiable: someone accepting a bribe in the course of their duties* (F117)
  - 1 (Never justifiable) to 10 (Always justifiable); negative values represent missing values. They were recoded into missing values before the analysis.

```
## Clear all objects in the work space
rm(list=ls())

## Load the data
load("WVS.Rdata")

## Select the relevant variables to minimize memory usage
WVS <- WVS[, list(F114, F115, F116, F117, S002, S003)]

## Set Wave and Country as key variables for fast reference
## S002: Wave
## S003: Country
setkeyv(WVS, c("S002", "S003"))

## Recode all negative values as NA
WVS[, `:=`(F114 = ifelse(F114 < 0, yes=NA, no=F114),
           F115 = ifelse(F115 < 0, yes=NA, no=F115),
           F116 = ifelse(F116 < 0, yes=NA, no=F116),
           F117 = ifelse(F117 < 0, yes=NA, no=F117))]
```

## Confirmatory factor analysis using the TSSEM approach

- We estimate the correlation matrix in each Wave and Country.
- The correlation matrices are used to fit a one-factor confirmatory factor analysis with the random-effects two-stage structural equation modeling (TSSEM) approach.

```
## Function to extract correlation matrix and sample sizes
## c21 to c43: Correlation matrix based on pairwise deletion among F114, F115, F116, and F117.
## n: Sample size based on the harmonic mean of the sample sizes in the correlation coefficients.
fun.cor <- function(dt) { ## Calculate the correlation matrix with pairwise deletion
  fit <- try(suppressWarnings(cor(dt[, 1:4, with=FALSE],
                                use="pairwise.complete.obs")), silent=TRUE)

  ## Calculate the sample sizes based on harmonic mean
  na.n <- t(!is.na(dt[, 1:4, with=FALSE])) %*% !is.na(dt[, 1:4, with=FALSE])
  pairwise.n <- na.n[lower.tri(na.n)]
  pairwise.n[pairwise.n==0] <- NA
  ## harmonic mean
  n <- as.integer(1/mean(1/pairwise.n, na.rm=TRUE))

  if (is.element("try-error", class(fit))) {
    list(c21=NaN, c31=NaN, c41=NaN, c32=NaN,
         c42=NaN, c43=NaN, n=NaN)
  } else {
```

```

        ## regression coefficients excluding the intercept
        list(c21=fit[2,1],c31=fit[3,1],c41=fit[4,1],
            c32=fit[3,2],c42=fit[4,2],c43=fit[4,3],n=n)
    }
}

##### Split data by Wave and Country and extract the correlation matrices
##### and sample size with the fun.cor() function
stage0.cor <- WVS[, fun.cor(.SD), by=list(S002,S003)]

## Exclude studies without any data
stage0.cor <- stage0.cor[!is.na(n)]

## Show part of the results
head(stage0.cor)

##      S002 S003      c21      c31      c41      c32      c42      c43
## 1:      1   32 0.4533558 0.3133980 0.2271336 0.4802159 0.3638483 0.2196182
## 2:      1   36 0.5849500 0.3743084 0.4728839 0.5053942 0.4342919 0.3321573
## 3:      1  246 0.3694929 0.2007690 0.1780308 0.4887677 0.2802600 0.3166599
## 4:      1  348 0.2099564          NA 0.2153735          NA 0.2037627          NA
## 5:      1  392 0.4326823 0.3315766 0.3141256 0.6160887 0.4499204 0.4618754
## 6:      1  410 0.3307074 0.2665575 0.2155814 0.3968305 0.2439903 0.4004814
##      n
## 1:  832
## 2: 1201
## 3:  998
## 4: 1407
## 5: 1058
## 6:  909

## Split the data into a list for ease of data analyses
data.splitted <- split(as.data.frame(stage0.cor), 1:nrow(stage0.cor))

## Convert correlation coefficients into correlation matrices
data.cor <- lapply(data.splitted, function(x) vec2symMat(unlist(x[, 3:8]), diag=FALSE) )

## Extract the sample sizes
data.n <- sapply(data.splitted, function(x) x[, 9])

##### Meta-analyze results with the TSSEM random-effects model
REM1.cfa <- tssem1(data.cor, data.n, method="REM", RE.type="Diag",
                  model.name="One factor model REM")

## Rerun the analysis to remove error code
## REM1.cfa <- rerun(REM1.cfa)
summary(REM1.cfa)

##
## Call:
## meta(y = ES, v = acovR, RE.constraints = Diag(x = paste(RE.startvalues,
##      "*Tau2_", 1:no.es, "_", 1:no.es, sep = "")), RE.lbound = RE.lbound,
##      I2 = I2, model.name = model.name, suppressWarnings = TRUE,
##      silent = silent, run = run)

```

```

##
## 95% confidence intervals: z statistic approximation
## Coefficients:
##           Estimate Std. Error   lbound   ubound z value Pr(>|z|)
## Intercept1 0.4304445 0.0086930 0.4134066 0.4474824 49.517 < 2.2e-16 ***
## Intercept2 0.3707085 0.0090174 0.3530347 0.3883823 41.110 < 2.2e-16 ***
## Intercept3 0.3220982 0.0095944 0.3032935 0.3409029 33.571 < 2.2e-16 ***
## Intercept4 0.4796892 0.0083280 0.4633665 0.4960118 57.599 < 2.2e-16 ***
## Intercept5 0.3804907 0.0088057 0.3632317 0.3977496 43.209 < 2.2e-16 ***
## Intercept6 0.4987723 0.0105300 0.4781339 0.5194106 47.367 < 2.2e-16 ***
## Tau2_1_1    0.0162257 0.0015820 0.0131251 0.0193263 10.257 < 2.2e-16 ***
## Tau2_2_2    0.0172790 0.0016984 0.0139503 0.0206077 10.174 < 2.2e-16 ***
## Tau2_3_3    0.0203306 0.0019599 0.0164894 0.0241719 10.373 < 2.2e-16 ***
## Tau2_4_4    0.0146320 0.0014426 0.0118046 0.0174594 10.143 < 2.2e-16 ***
## Tau2_5_5    0.0167704 0.0016270 0.0135816 0.0199591 10.308 < 2.2e-16 ***
## Tau2_6_6    0.0241432 0.0023285 0.0195794 0.0287071 10.368 < 2.2e-16 ***
## ---
## Signif. codes:  0 '***' 0.001 '**' 0.01 '*' 0.05 '.' 0.1 ' ' 1
##
## Q statistic on the homogeneity of effect sizes: 74439.54
## Degrees of freedom of the Q statistic: 1328
## P value of the Q statistic: 0
##
## Heterogeneity indices (based on the estimated Tau2):
##                               Estimate
## Intercept1: I2 (Q statistic)  0.9765
## Intercept2: I2 (Q statistic)  0.9731
## Intercept3: I2 (Q statistic)  0.9759
## Intercept4: I2 (Q statistic)  0.9749
## Intercept5: I2 (Q statistic)  0.9754
## Intercept6: I2 (Q statistic)  0.9884
##
## Number of studies (or clusters): 230
## Number of observed statistics: 1334
## Number of estimated parameters: 12
## Degrees of freedom: 1322
## -2 log likelihood: -1509.782
## OpenMx status1: 0 ("0" or "1": The optimization is considered fine.
## Other values may indicate problems.)

```

```

## Show the pooled correlation matrix
vec2symMat(coef(REM1.cfa, select="fixed"), diag=FALSE)

```

```

##           [,1]      [,2]      [,3]      [,4]
## [1,] 1.0000000 0.4304445 0.3707085 0.3220982
## [2,] 0.4304445 1.0000000 0.4796892 0.3804907
## [3,] 0.3707085 0.4796892 1.0000000 0.4987723
## [4,] 0.3220982 0.3804907 0.4987723 1.0000000

```

```

## Show the variance components of the random effects
Diag(coef(REM1.cfa, select="random"))

```

```

##           [,1]      [,2]      [,3]      [,4]      [,5]      [,6]

```

```
## [1,] 0.0162257 0.00000000 0.00000000 0.00000000 0.00000000 0.00000000
## [2,] 0.0000000 0.01727902 0.00000000 0.00000000 0.00000000 0.00000000
## [3,] 0.0000000 0.00000000 0.02033064 0.00000000 0.00000000 0.00000000
## [4,] 0.0000000 0.00000000 0.00000000 0.01463205 0.00000000 0.00000000
## [5,] 0.0000000 0.00000000 0.00000000 0.00000000 0.01677037 0.00000000
## [6,] 0.0000000 0.00000000 0.00000000 0.00000000 0.00000000 0.02414322
```

```
## Setup a one-factor CFA model in RAM specification
A1 <- matrix(c("0.2*F114", "0.2*F115", "0.2*F116", "0.2*F117",0), ncol=1)
A1 <- cbind(matrix(0, ncol=4, nrow=5), A1)
dimnames(A1)[[1]] <- dimnames(A1)[[2]] <- c("F114","F115","F116","F117","Fraud")
```

```
## A matrix for regression coefficients and factor loadings
A1
```

```
##      F114 F115 F116 F117 Fraud
## F114 "0"  "0"  "0"  "0"  "0.2*F114"
## F115 "0"  "0"  "0"  "0"  "0.2*F115"
## F116 "0"  "0"  "0"  "0"  "0.2*F116"
## F117 "0"  "0"  "0"  "0"  "0.2*F117"
## Fraud "0"  "0"  "0"  "0"  "0"
```

```
S1 <- Diag(c("0.2*ErrVar_F114", "0.2*ErrVar_F115",
             "0.2*ErrVar_F116", "0.2*ErrVar_F117", "1") )
dimnames(S1)[[1]] <- dimnames(S1)[[2]] <- c("F114","F115","F116","F117","Fraud")
```

```
## S matrix for variances and covariances
S1
```

```
##      F114      F115      F116
## F114 "0.2*ErrVar_F114" "0"      "0"
## F115 "0"              "0.2*ErrVar_F115" "0"
## F116 "0"              "0"      "0.2*ErrVar_F116"
## F117 "0"              "0"      "0"
## Fraud "0"            "0"      "0"
##      F117      Fraud
## F114 "0"      "0"
## F115 "0"      "0"
## F116 "0"      "0"
## F117 "0.2*ErrVar_F117" "0"
## Fraud "0"      "1"
```

```
F1 <- create.Fmatrix(c(1,1,1,1,0), as.mxMatrix=FALSE)
dimnames(F1)[[1]] <- c("F114","F115","F116","F117")
dimnames(F1)[[2]] <- c("F114","F115","F116","F117","Fraud")
```

```
## F matrix to select observed variables
F1
```

```
##      F114 F115 F116 F117 Fraud
## F114  1   0   0   0   0
## F115  0   1   0   0   0
## F116  0   0   1   0   0
## F117  0   0   0   1   0
```

```
##### Fit a one-factor CFA model on the average correlation matrix
REM2.cfa <- tssem2(REM1.cfa, Amatrix=A1, Smatrix=S1, Fmatrix=F1, diag.constraints=TRUE,
                  intervals.type="LB", model.name="One factor model REM Stage 2 analysis")
summary(REM2.cfa)

##
## Call:
## wls(Cov = pooledS, asyCov = asyCov, n = tssem1.obj$total.n, Amatrix = Amatrix,
##     Smatrix = Smatrix, Fmatrix = Fmatrix, diag.constraints = diag.constraints,
##     cor.analysis = cor.analysis, intervals.type = intervals.type,
##     mx.algebras = mx.algebras, model.name = model.name, suppressWarnings = suppressWarnings,
##     silent = silent, run = run)
##
## 95% confidence intervals: Likelihood-based statistic
## Coefficients:
##           Estimate Std. Error  lbound  ubound z value Pr(>|z|)
## F114           0.56264         NA 0.54597 0.57945     NA     NA
## F115           0.68028         NA 0.66209 0.69875     NA     NA
## F116           0.72028         NA 0.70081 0.74006     NA     NA
## F117           0.60689         NA 0.58881 0.62514     NA     NA
## ErrVar_F114    0.68344         NA 0.66423 0.70193     NA     NA
## ErrVar_F115    0.53722         NA 0.51175 0.56160     NA     NA
## ErrVar_F116    0.48119         NA 0.45232 0.50888     NA     NA
## ErrVar_F117    0.63168         NA 0.60922 0.65333     NA     NA
##
## Goodness-of-fit indices:
##                                     Value
## Sample size                          3.1200e+05
## Chi-square of target model            9.9253e+01
## DF of target model                    2.0000e+00
## p value of target model               0.0000e+00
## Number of constraints imposed on "Smatrix" 4.0000e+00
## DF manually adjusted                  0.0000e+00
## Chi-square of independence model      1.2203e+04
## DF of independence model              6.0000e+00
## RMSEA                                 1.2500e-02
## RMSEA lower 95% CI                   1.0500e-02
## RMSEA upper 95% CI                   1.4600e-02
## SRMR                                  3.8300e-02
## TLI                                   9.7610e-01
## CFI                                   9.9200e-01
## AIC                                   9.5253e+01
## BIC                                   7.3951e+01
## OpenMx status1: 0 ("0" or "1": The optimization is considered fine.
## Other values indicate problems.)

## Convert the model to semPlotModel object
library("semPlot")
my.plot <- meta2semPlot(REM2.cfa, manNames=c("F114", "F115", "F116", "F117"),
                       latNames=c("Fraud"))

## Plot the model with labels
semPaths(my.plot, whatLabels="est", nCharEdges=10, nCharNodes=10,
```

```
edge.label.cex=1.3, color="yellow")
```

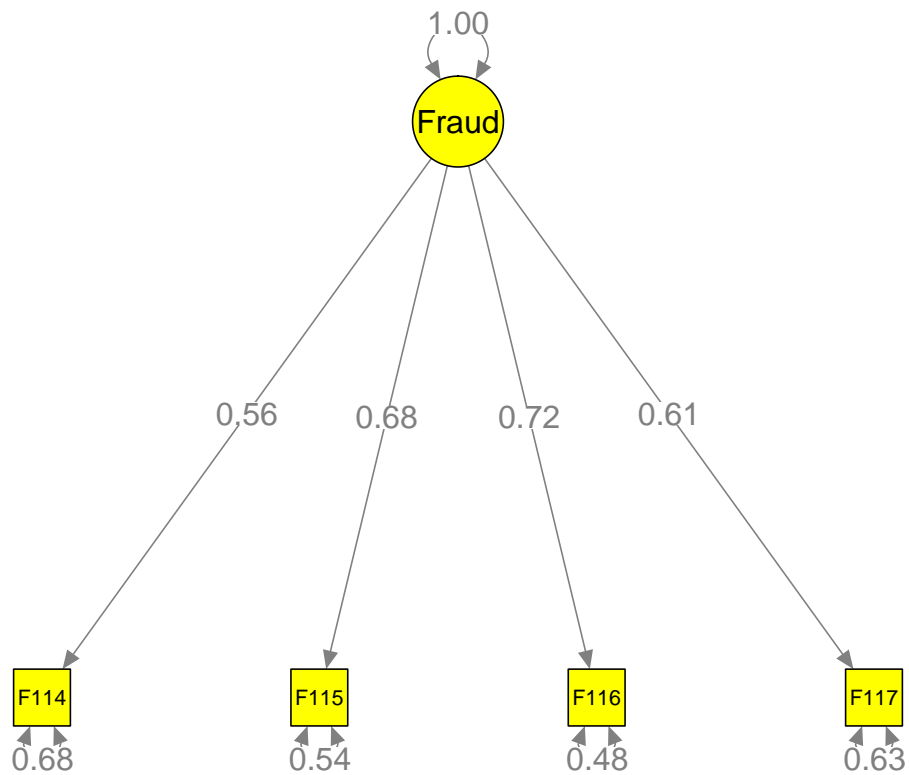

## Reliability generalizability with a random-effects model

- The coefficient alpha and its sampling variance are estimated in each Wave and Country.
- Random- and mixed-effects meta-analyses are tested.

```
## Function to extract coefficient alpha and its sampling variance
## y: estimated coefficient alpha
## v: sampling variance of coefficient alpha
fun.rel <- function(dt) { Cov <- try(cov(dt[, 1:4, with=FALSE],
                                     use="pairwise.complete.obs"), silent=TRUE)
  na.n <- t(!is.na(dt[, 1:4, with=FALSE])) %*% !is.na(dt[, 1:4, with=FALSE])
  pairwise.n <- na.n[lower.tri(na.n, diag=TRUE)]
  pairwise.n[pairwise.n==0] <- NA
  ## harmonic mean
  n <- as.integer(1/mean(1/pairwise.n, na.rm=TRUE))

  if (is.element("try-error", class(Cov))) {
    list(y=NaN, v=NaN)
  } else {
    if (any(is.na(Cov))) {
      list(y=NaN, v=NaN)
    } else {
```

```

        ## no. of items
        q <- ncol(Cov)
        var.item <- sum(diag(Cov))
        var.scale <- sum(Cov)
        ## y: coefficient alpha
        y <- q*(1-var.item/var.scale)/(q-1)
        ## Bonett (2010, Eq.5)
        ## v: sampling variance of y (Bonett, 2010, Eq. 5)
        v <- 2*q*(1-y)^2/((q-1)*(n-2))
        list(y=y,v=v)
    }
}
}

##### Split data by Wave and Country and analyze data with the fun.rel() function
REM1.rel <- WVS[, fun.rel(.SD), by=list(S002,S003)]

## Adjust the scale so that Wave 1 is S002=0.
REM1.rel[, `:=`(S002 = S002-1)]

##### Meta-analyze results with a random-effects meta-analysis by using "Wave" as a predictor
REM2.rel <- meta(y=y, v=v, x=S002, data=REM1.rel,
                model.name="Reliability generalization REM")
summary(REM2.rel)

##
## Call:
## meta(y = y, v = v, x = S002, data = REM1.rel, model.name = "Reliability generalization REM")
##
## 95% confidence intervals: z statistic approximation
## Coefficients:
##           Estimate Std.Error   lbound   ubound z value Pr(>|z|)
## Intercept1 0.63529896 0.01655030 0.60286098 0.66773695 38.3860 < 2.2e-16
## Slope1_1    0.02123623 0.00457418 0.01227101 0.03020145  4.6426  3.44e-06
## Tau2_1_1    0.00871555 0.00086861 0.00701311 0.01041799 10.0339 < 2.2e-16
##
## Intercept1 ***
## Slope1_1    ***
## Tau2_1_1    ***
## ---
## Signif. codes:  0 '***' 0.001 '**' 0.01 '*' 0.05 '.' 0.1 ' ' 1
##
## Q statistic on the homogeneity of effect sizes: 24774.77
## Degrees of freedom of the Q statistic: 216
## P value of the Q statistic: 0
##
## Explained variances (R2):
##                               y1
## Tau2 (no predictor)          0.0096
## Tau2 (with predictors)       0.0087
## R2                           0.0926
##
## Number of studies (or clusters): 238

```

```

## Number of observed statistics: 217
## Number of estimated parameters: 3
## Degrees of freedom: 214
## -2 log likelihood: -404.9844
## OpenMx status1: 0 ("0" or "1": The optimization is considered fine.
## Other values may indicate problems.)

```

## Settings of the R system

```
sessionInfo()
```

```

## R version 3.2.5 (2016-04-14)
## Platform: x86_64-w64-mingw32/x64 (64-bit)
## Running under: Windows 7 x64 (build 7601) Service Pack 1
##
## locale:
## [1] LC_COLLATE=English_United States.1252
## [2] LC_CTYPE=English_United States.1252
## [3] LC_MONETARY=English_United States.1252
## [4] LC_NUMERIC=C
## [5] LC_TIME=English_United States.1252
##
## attached base packages:
## [1] parallel stats graphics grDevices utils datasets methods
## [8] base
##
## other attached packages:
## [1] metaSEM_0.9.8 OpenMx_2.5.2 Rcpp_0.12.4 Matrix_1.2-6
## [5] MASS_7.3-45 digest_0.6.9 data.table_1.9.6 lavaan_0.5-20
## [9] semPlot_1.0.1
##
## loaded via a namespace (and not attached):
## [1] splines_3.2.5 ellipse_0.3-8 gtools_3.5.0
## [4] Formula_1.2-1 stats4_3.2.5 latticeExtra_0.6-28
## [7] yaml_2.1.13 d3Network_0.5.2.1 lisrelToR_0.1.4
## [10] pbivnorm_0.6.0 lattice_0.20-33 quantreg_5.21
## [13] quadprog_1.5-5 chron_2.3-47 RColorBrewer_1.1-2
## [16] ggm_2.3 minqa_1.2.4 colorspace_1.2-6
## [19] htmltools_0.3.5 plyr_1.8.3 psych_1.6.4
## [22] XML_3.98-1.4 SparseM_1.7 corpcor_1.6.8
## [25] scales_0.4.0 glasso_1.8 sna_2.3-2
## [28] whisker_0.3-2 jpeg_0.1-8 fdrtool_1.2.15
## [31] lme4_1.1-12 MatrixModels_0.4-1 huge_1.2.7
## [34] arm_1.8-6 rockchalk_1.8.101 mgcv_1.8-12
## [37] car_2.1-2 ggplot2_2.1.0 nnet_7.3-12
## [40] pbkrtest_0.4-6 mnormt_1.5-4 survival_2.39-3
## [43] magrittr_1.5 evaluate_0.9 nlme_3.1-127
## [46] foreign_0.8-66 tools_3.2.5 formatR_1.4
## [49] stringr_1.0.0 munsell_0.4.3 cluster_2.0.4
## [52] sem_3.1-7 grid_3.2.5 nloptr_1.0.4
## [55] rjson_0.2.15 igraph_1.0.1 rmarkdown_0.9.6

```



```
## [58] boot_1.3-18      mi_1.0             gtable_0.2.0
## [61] abind_1.4-3        reshape2_1.4.1    qgraph_1.3.3
## [64] gridExtra_2.2.1    knitr_1.13        Hmisc_3.17-4
## [67] stringi_1.0-1      matrixcalc_1.0-3  rpart_4.1-10
## [70] acepack_1.3-3.3    png_0.1-7         coda_0.18-1
```
